# Supplementary material
Source: PubMed Central journal article supplement (PMC3437822)
Supplement: 1212547109_pnas.201212547SI.pdf [file 1212547109_pnas.201212547SI.pdf]

# Supporting Information

Yu et al. 10.1073/pnas.1212547109

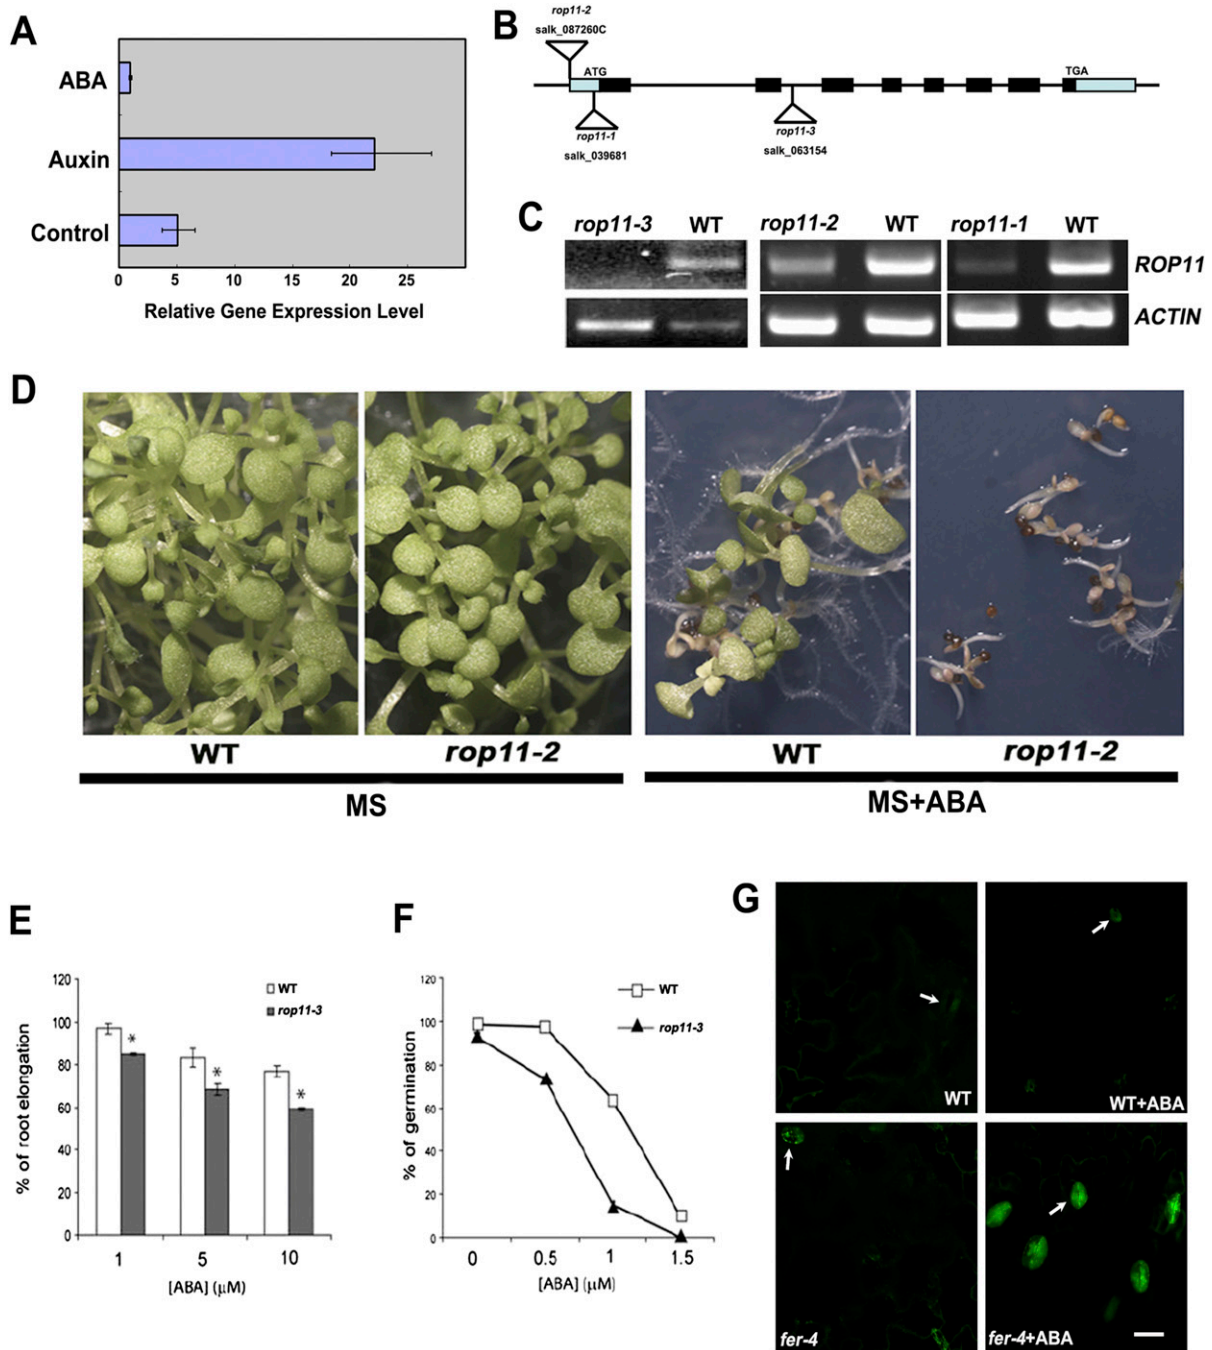

**Fig. S1.** Hormone-regulated *FER* expression and phenotypic analyses of *rop11/arc10*. (A) Quantitative RT-PCR analysis of *FER* transcripts under auxin and ABA treatments (*Materials and Methods*). Three independent experiments yielded similar results. (B) Scheme of *ROP11/ARAC10* gene organization and position of T-DNA insertions. The ATG start codon and TGA stop codon are indicated; boxes are exons, and lines are introns. The exact site for T-DNA insertions (indicated by triangles) was mapped by PCR and DNA sequencing of the PCR products. (C) RT-PCR analysis showing levels of *ROP11/ARAC10* transcripts in *rop11/arc10-1*, *rop11/arc10-2*, and *rop11/arc10-3* mutant lines. *ACTIN2* were used as loading control. (D) ABA sensitivity of WT and mutant seedlings. Physiologically comparable seeds of WT and *rop11/arc10-2* mutant were sterilized and plated on MS medium supplemented with 0 or 2  $\mu$ M ABA at 23 °C for 12 d. (E) ABA inhibition of root elongation. *rop11/arc10-3* seedlings are more sensitive to inhibition of root elongation by ABA compared with WT. Data represent average  $\pm$  SE of three independent experiments with 10 seedlings each. (F) *rop11/arc10-3* seeds are more responsive to ABA inhibition during germination. Data represent average  $\pm$  SE of three independent experiments with  $\sim$ 100 seeds each. (G) ROS production in guard cells of WT and *fer-4* mutant with or without ABA, indicated by fluorescent dye 2', 7'-dichlorodihydro-fluorescein diacetate.
